# Supplementary material for: Inferring epidemiological parameters from phylogenies using regression-ABC: A comparative study
Source: PubMed Central journal article supplement (PMC5358897; doi:10.1371/journal.pcbi.1005416), 2017-03-06
Supplement: pcbi.1005416.s001.pdf [file pcbi.1005416.s001.pdf]

## S1 Text

### Ordinary differential equation systems of BD, SIR and BDEI models.

In the following ordinary differential equation systems of BD (Eq. S1), SIR (Eq. S2) and BDEI (Eq. S3) models,  $S(t)$ ,  $E(t)$ ,  $I(t)$  and  $R(t)$  respectively denote the number of Susceptible, Exposed, Infectious and Removed individuals at time  $t$ .

$$\frac{dI(t)}{dt} = \beta I(t) - (\gamma + \varepsilon)I(t) \quad (\text{S1})$$

$$\frac{dS(t)}{dt} = -\beta \frac{S(t)}{N} I(t) \quad (\text{S2a})$$

$$\frac{dI(t)}{dt} = \beta \frac{S(t)}{N} I(t) - (\gamma + \varepsilon)I(t) \quad (\text{S2b})$$

$$\frac{dR(t)}{dt} = (\gamma + \varepsilon)I(t) \quad (\text{S2c})$$

$$\frac{dE(t)}{dt} = \beta I(t) - \sigma E(t) \quad (\text{S3a})$$

$$\frac{dI(t)}{dt} = \sigma E(t) - (\gamma + \varepsilon)I(t) \quad (\text{S3b})$$
