# Supplementary material for: Inferring epidemiological parameters from phylogenies using regression-ABC: A comparative study
Source: PubMed Central journal article supplement (PMC5358897; doi:10.1371/journal.pcbi.1005416), 2017-03-06
Supplement: pcbi.1005416.s002.pdf [file pcbi.1005416.s002.pdf]

## S2 Text

### Protocol for simulating target trees assuming the differential-risk model with the rcolgem coalescent framework.

Using a modified version of the `simulate.DiffRisk.R` script, which we found in the `kamphir-master/drivers/` directory of the online repository, we simulated four sets of target trees with the `rcolgem` coalescent framework [1, 2]: ultrametric trees of 300 leaves, non-ultrametric trees of 300 leaves, ultrametric trees of 1,000 leaves and non-ultrametric trees of 1,000 leaves.

For each set, we simulated two subset of 100 target trees assuming the following parameter values :

- $\beta = 0.01$  (transmission rate)
- $\gamma = \frac{1}{520}$  (additional mortality rate, i.e. virulence)
- $N = 3000$  (total population size)
- $\mu = \frac{1}{3640}$  (basal mortality rate)
- $c_2 = 1.0$  (contact rate associated with risk group 2)
- $\rho = 0.9$  (proportion of assortative mixing)
- $f = 0.5$  (frequency of risk group 1)

The first subset was simulated assuming  $c_1 = 0.5$  and the second with  $c_1 = 2$  (contact rate associated with risk group 1). These parameter values are identical to those used to validate the kernel-ABC method assuming the SI-DR model in [3].

As in [3], we used the following starting and stopping conditions for the simulations:

- $t_{end} = 30 \times 52$  (time between the beginning of the epidemic and the last sample)
- $ntips = 300$  or  $1000$  depending on the target set (sample size)
- $S_1 = f \times N - 1$  (initial number of susceptible individuals in risk group 1)
- $S_2 = (1 - f) \times N$  (initial number of susceptible individuals in risk group 2)
- $I_1 = 1$  (initial number of infectious individuals in risk group 1)
- $I_2 = 0$  (initial number of infectious individuals in risk group 2)

Sampling dates of ultrametric trees were all fixed to  $t_{end}$ . For non-ultrametric trees, we randomly drew  $ntips$  (300 or 1,000) sampling dates from a uniform law  $\mathcal{U}(\frac{t_{end}}{2}; t_{end})$  (so tip heights are in  $[0; \frac{t_{end}}{2}]$ ) and used these dates for all target trees (respectively trees of 300 or 1,000 leaves).

In [3], the target trees were first simulated with the `rcolgem` coalescent framework then re-estimated using phylogenetic methods via sequence simulation. This was done "to provide idealized conditions for parameter estimation using either BEAST2 or the kernel-ABC method—in other words, to identify biases inherent to either framework rather than due to uncertainty in phylogenetic reconstruction" [3]. Here, we did not re-estimate the target trees. Thus we estimated parameter values directly from `rcolgem` trees. If anything, we expect this change to improve the performance of the kernel-ABC method.

## References

- [1] Volz EM. Complex population dynamics and the coalescent under neutrality. *Genetics*. 2012 Jan;190(1):187–201. Available from: <http://dx.doi.org/10.1534/genetics.111.134627>.
- [2] Rasmussen DA, Volz EM, Koelle K. Phylodynamic inference for structured epidemiological models. *PLoS Comput Biol*. 2014 Apr;10(4):e1003570. Available from: <http://dx.doi.org/10.1371/journal.pcbi.1003570>.
- [3] Poon AFY. Phylodynamic Inference with Kernel ABC and Its Application to HIV Epidemiology. *Mol Biol Evol*. 2015 Sep;32(9):2483–2495. Available from: <http://dx.doi.org/10.1093/molbev/msv123>.
