# Supplementary material for: Inferring epidemiological parameters from phylogenies using regression-ABC: A comparative study
Source: PubMed Central journal article supplement (PMC5358897; doi:10.1371/journal.pcbi.1005416), 2017-03-06
Supplement: pcbi.1005416.s020.pdf [file pcbi.1005416.s020.pdf]

## S5 Table

Table of correlations between the summary statistics of the BL, TOPO and LTT sets and the epidemiological parameters of the BD model, for trees of 100 leaves.

| Summary statistics      | Set  | $R_0$ | $d_i$ | Sum  |
|-------------------------|------|-------|-------|------|
| <i>mean_s_time</i>      | LTT  | -0.67 | 0.69  | 1.4  |
| <i>max_H</i>            | BL   | -0.62 | 0.74  | 1.4  |
| <i>t_max_L</i>          | LTT  | -0.64 | 0.72  | 1.4  |
| <i>slope_1</i>          | LTT  | 0.69  | -0.67 | 1.4  |
| <i>slope_2</i>          | LTT  | 0.64  | -0.72 | 1.4  |
| <i>mean_b_time[2]</i>   | LTT  | -0.66 | 0.7   | 1.4  |
| <i>i_BL_var_[2]</i>     | BL   | -0.6  | 0.75  | 1.4  |
| <i>i_BL_mean_[1]</i>    | BL   | -0.62 | 0.72  | 1.3  |
| <i>i_BL_mean_[2]</i>    | BL   | -0.58 | 0.76  | 1.3  |
| <i>e_BL_var</i>         | BL   | -0.56 | 0.77  | 1.3  |
| <i>i_BL_median_[2]</i>  | BL   | -0.57 | 0.76  | 1.3  |
| <i>i_BL_var_[1]</i>     | BL   | -0.61 | 0.71  | 1.3  |
| <i>i_BL_var_[3]</i>     | BL   | -0.59 | 0.73  | 1.3  |
| <i>a_BL_var</i>         | BL   | -0.51 | 0.79  | 1.3  |
| <i>i_BL_median_[1]</i>  | BL   | -0.6  | 0.7   | 1.3  |
| <i>a_BL_mean</i>        | BL   | -0.49 | 0.79  | 1.3  |
| <i>a_BL_median</i>      | BL   | -0.48 | 0.79  | 1.3  |
| <i>mean_b_time[1]</i>   | LTT  | -0.66 | 0.61  | 1.3  |
| <i>i_BL_mean_[3]</i>    | BL   | -0.48 | 0.78  | 1.3  |
| <i>e_BL_mean</i>        | BL   | -0.44 | 0.8   | 1.2  |
| <i>i_BL_median_[3]</i>  | BL   | -0.44 | 0.78  | 1.2  |
| <i>e_BL_median</i>      | BL   | -0.39 | 0.8   | 1.2  |
| <i>mean_b_time[3]</i>   | LTT  | -0.4  | 0.74  | 1.1  |
| <i>min_H</i>            | BL   | -0.36 | 0.72  | 1.1  |
| <i>max_L</i>            | LTT  | 0.63  | 0     | 0.63 |
| <i>ie_BL_mean_[2]</i>   | BL   | -0.58 | 0     | 0.58 |
| <i>ie_BL_mean_[1]</i>   | BL   | -0.54 | 0     | 0.54 |
| <i>ie_BL_median_[2]</i> | BL   | -0.54 | 0     | 0.54 |
| <i>ie_BL_median_[1]</i> | BL   | -0.5  | -0.01 | 0.51 |
| <i>slope_ratio</i>      | LTT  | 0.36  | 0.01  | 0.37 |
| <i>staircaseness_1</i>  | TOPO | 0.36  | 0     | 0.36 |
| <i>sackin</i>           | TOPO | -0.34 | 0     | 0.34 |
| <i>ie_BL_var_[1]</i>    | BL   | -0.32 | 0     | 0.32 |
| <i>IL_nodes</i>         | TOPO | -0.31 | 0     | 0.31 |
| <i>ie_BL_var_[2]</i>    | BL   | -0.31 | 0     | 0.31 |
| <i>staircaseness_2</i>  | TOPO | -0.27 | 0     | 0.27 |
| <i>WD_ratio</i>         | TOPO | 0.26  | 0     | 0.26 |
| <i>ie_BL_mean_[3]</i>   | BL   | -0.25 | 0     | 0.25 |
| <i>ie_BL_median_[3]</i> | BL   | -0.19 | 0     | 0.19 |
| <i>ie_BL_var_[3]</i>    | BL   | -0.19 | 0     | 0.19 |
| <i>max_ladder</i>       | TOPO | -0.15 | 0     | 0.15 |
| $\Delta w$              | TOPO | 0.14  | 0     | 0.14 |
| <i>colless</i>          | TOPO | 0.01  | 0.01  | 0.02 |
