# Supplementary material for: Inferring epidemiological parameters from phylogenies using regression-ABC: A comparative study
Source: PubMed Central journal article supplement (PMC5358897; doi:10.1371/journal.pcbi.1005416), 2017-03-06
Supplement: pcbi.1005416.s021.pdf [file pcbi.1005416.s021.pdf]

## S6 Table

Table of correlations between the summary statistics of the BL, TOPO and LTT sets and the epidemiological parameters of the BD model, for trees of 1,000 leaves.

| Summary statistics      | Set  | $R_0$ | $d_i$ | Sum  |
|-------------------------|------|-------|-------|------|
| <i>mean_s_time</i>      | LTT  | -0.52 | 0.43  | 0.95 |
| <i>max_H</i>            | BL   | -0.48 | 0.47  | 0.95 |
| <i>t_max_L</i>          | LTT  | -0.49 | 0.46  | 0.95 |
| <i>slope_1</i>          | LTT  | 0.53  | -0.42 | 0.95 |
| <i>mean_b_time[2]</i>   | LTT  | -0.51 | 0.44  | 0.95 |
| <i>slope_2</i>          | LTT  | 0.49  | -0.45 | 0.94 |
| <i>i_BL_var_[2]</i>     | BL   | -0.47 | 0.47  | 0.94 |
| <i>i_BL_mean_[1]</i>    | BL   | -0.48 | 0.45  | 0.93 |
| <i>i_BL_mean_[2]</i>    | BL   | -0.45 | 0.48  | 0.93 |
| <i>i_BL_var_[3]</i>     | BL   | -0.46 | 0.46  | 0.92 |
| <i>e_BL_var</i>         | BL   | -0.43 | 0.49  | 0.92 |
| <i>i_BL_var_[1]</i>     | BL   | -0.47 | 0.45  | 0.92 |
| <i>i_BL_median_[2]</i>  | BL   | -0.44 | 0.48  | 0.92 |
| <i>a_BL_var</i>         | BL   | -0.4  | 0.5   | 0.9  |
| <i>i_BL_median_[1]</i>  | BL   | -0.46 | 0.44  | 0.9  |
| <i>a_BL_mean</i>        | BL   | -0.39 | 0.5   | 0.89 |
| <i>a_BL_median</i>      | BL   | -0.38 | 0.5   | 0.88 |
| <i>mean_b_time[1]</i>   | LTT  | -0.5  | 0.38  | 0.88 |
| <i>i_BL_mean_[3]</i>    | BL   | -0.38 | 0.49  | 0.87 |
| <i>e_BL_mean</i>        | BL   | -0.35 | 0.51  | 0.86 |
| <i>i_BL_median_[3]</i>  | BL   | -0.35 | 0.49  | 0.84 |
| <i>e_BL_median</i>      | BL   | -0.32 | 0.51  | 0.83 |
| <i>mean_b_time[3]</i>   | LTT  | -0.32 | 0.47  | 0.79 |
| <i>min_H</i>            | BL   | -0.29 | 0.46  | 0.75 |
| <i>max_L</i>            | LTT  | 0.45  | 0     | 0.45 |
| <i>ie_BL_mean_[2]</i>   | BL   | -0.42 | 0     | 0.42 |
| <i>ie_BL_mean_[1]</i>   | BL   | -0.39 | 0     | 0.39 |
| <i>ie_BL_median_[2]</i> | BL   | -0.39 | 0     | 0.39 |
| <i>ie_BL_median_[1]</i> | BL   | -0.36 | 0     | 0.36 |
| <i>staircaseness_1</i>  | TOPO | 0.26  | 0     | 0.26 |
| <i>slope_ratio</i>      | LTT  | 0.26  | 0     | 0.26 |
| <i>sackin</i>           | TOPO | -0.24 | 0.01  | 0.25 |
| <i>ie_BL_var_[1]</i>    | BL   | -0.23 | 0     | 0.23 |
| <i>ie_BL_var_[2]</i>    | BL   | -0.23 | 0     | 0.23 |
| <i>IL_nodes</i>         | TOPO | -0.22 | 0     | 0.22 |
| <i>WD_ratio</i>         | TOPO | 0.18  | -0.01 | 0.19 |
| <i>staircaseness_2</i>  | TOPO | -0.19 | 0     | 0.19 |
| <i>ie_BL_mean_[3]</i>   | BL   | -0.18 | 0     | 0.18 |
| <i>ie_BL_median_[3]</i> | BL   | -0.13 | -0.01 | 0.14 |
| <i>ie_BL_var_[3]</i>    | BL   | -0.13 | 0     | 0.13 |
| $\Delta w$              | TOPO | 0.1   | -0.01 | 0.11 |
| <i>max_ladder</i>       | TOPO | -0.1  | 0     | 0.1  |
| <i>colless</i>          | TOPO | 0.01  | 0     | 0.01 |
