# Supplementary material for: Inferring epidemiological parameters from phylogenies using regression-ABC: A comparative study
Source: PubMed Central journal article supplement (PMC5358897; doi:10.1371/journal.pcbi.1005416), 2017-03-06
Supplement: pcbi.1005416.s023.pdf [file pcbi.1005416.s023.pdf]

## S8 Table

Table of correlations between the summary statistics of the COORDS set and the epidemiological parameters of the BD model, for trees of 1,000 leaves.

| Coordinate | $R_0$ | $d_i$ | Sum  |
|------------|-------|-------|------|
| $x_4$      | -0.67 | 0.71  | 1.4  |
| $x_5$      | -0.67 | 0.71  | 1.4  |
| $x_9$      | -0.66 | 0.72  | 1.4  |
| $x_2$      | -0.67 | 0.7   | 1.4  |
| $x_3$      | -0.67 | 0.7   | 1.4  |
| $x_6$      | -0.66 | 0.71  | 1.4  |
| $x_7$      | -0.66 | 0.71  | 1.4  |
| $x_8$      | -0.66 | 0.71  | 1.4  |
| $x_{10}$   | -0.65 | 0.72  | 1.4  |
| $x_{11}$   | -0.65 | 0.72  | 1.4  |
| $x_{12}$   | -0.64 | 0.73  | 1.4  |
| $x_{13}$   | -0.64 | 0.73  | 1.4  |
| $x_{14}$   | -0.64 | 0.73  | 1.4  |
| $x_{15}$   | -0.64 | 0.73  | 1.4  |
| $x_{16}$   | -0.64 | 0.73  | 1.4  |
| $x_{17}$   | -0.64 | 0.73  | 1.4  |
| $x_{18}$   | -0.64 | 0.73  | 1.4  |
| $x_{19}$   | -0.64 | 0.73  | 1.4  |
| $x_{20}$   | -0.64 | 0.73  | 1.4  |
| $x_1$      | -0.66 | 0.7   | 1.4  |
| $y_5$      | 0.62  | 0     | 0.62 |
| $y_6$      | 0.62  | 0     | 0.62 |
| $y_7$      | 0.62  | 0     | 0.62 |
| $y_8$      | 0.62  | 0     | 0.62 |
| $y_9$      | 0.62  | 0     | 0.62 |
| $y_{10}$   | 0.62  | 0     | 0.62 |
| $y_{11}$   | 0.62  | 0     | 0.62 |
| $y_{12}$   | 0.62  | 0     | 0.62 |
| $y_{13}$   | 0.62  | 0     | 0.62 |
| $y_3$      | 0.61  | 0     | 0.61 |
| $y_4$      | 0.61  | 0     | 0.61 |
| $y_{14}$   | 0.61  | 0     | 0.61 |
| $y_2$      | 0.6   | 0     | 0.6  |
| $y_{15}$   | 0.6   | 0     | 0.6  |
| $y_{16}$   | 0.59  | 0     | 0.59 |
| $y_1$      | 0.58  | 0     | 0.58 |
| $y_{17}$   | 0.55  | 0     | 0.55 |
| $y_{18}$   | 0.49  | 0     | 0.49 |
| $y_{19}$   | 0.35  | 0     | 0.35 |
| $y_{20}$   | 0.12  | 0     | 0.12 |
