# Supplementary material for: Inferring epidemiological parameters from phylogenies using regression-ABC: A comparative study
Source: PubMed Central journal article supplement (PMC5358897; doi:10.1371/journal.pcbi.1005416), 2017-03-06
Supplement: pcbi.1005416.s024.pdf [file pcbi.1005416.s024.pdf]

## S9 Table

Table of correlations between the summary statistics of the BL, TOPO and LTT sets and the epidemiological parameters of the SI-DR model, for ultrametric trees of 300 leaves.

| Summary statistics      | Set  | $c_1$ | $\beta$ | $\gamma$ | $N$   | Sum  |
|-------------------------|------|-------|---------|----------|-------|------|
| <i>ie_BL_median_[2]</i> | BL   | 0.32  | 0.2     | 0.69     | -0.23 | 1.4  |
| <i>ie_BL_mean_[2]</i>   | BL   | 0.32  | 0.21    | 0.66     | -0.22 | 1.4  |
| <i>ie_BL_mean_[3]</i>   | BL   | 0.27  | 0.19    | 0.65     | -0.24 | 1.4  |
| <i>ie_BL_median_[3]</i> | BL   | 0.26  | 0.17    | 0.67     | -0.24 | 1.3  |
| <i>i_BL_var_[2]</i>     | BL   | 0.45  | 0.35    | 0.41     | -0.13 | 1.3  |
| <i>i_BL_var_[3]</i>     | BL   | 0.37  | 0.34    | 0.36     | -0.12 | 1.2  |
| <i>e_BL_mean</i>        | BL   | 0.13  | 0.25    | -0.53    | 0.23  | 1.1  |
| <i>a_BL_mean</i>        | BL   | 0.21  | 0.3     | -0.43    | 0.19  | 1.1  |
| <i>e_BL_median</i>      | BL   | 0.09  | 0.23    | -0.57    | 0.23  | 1.1  |
| <i>ie_BL_mean_[1]</i>   | BL   | -0.11 | -0.34   | 0.45     | -0.21 | 1.1  |
| <i>a_BL_median</i>      | BL   | 0.14  | 0.22    | -0.52    | 0.22  | 1.1  |
| <i>ie_BL_median_[1]</i> | BL   | -0.18 | -0.4    | 0.35     | -0.17 | 1.1  |
| <i>a_BL_var</i>         | BL   | 0.27  | 0.36    | -0.31    | 0.15  | 1.1  |
| <i>i_BL_mean_[3]</i>    | BL   | 0.21  | 0.32    | -0.38    | 0.17  | 1.1  |
| <i>mean_b_time[3]</i>   | LTT  | 0.04  | 0.17    | -0.62    | 0.25  | 1.1  |
| <i>i_BL_median_[3]</i>  | BL   | 0.17  | 0.3     | -0.42    | 0.17  | 1.1  |
| <i>t_max_L</i>          | LTT  | 0.55  | 0.17    | 0.22     | -0.09 | 1    |
| <i>slope_1</i>          | LTT  | -0.55 | -0.17   | -0.22    | 0.09  | 1    |
| <i>mean_b_time[1]</i>   | LTT  | -0.11 | -0.33   | 0.41     | -0.18 | 1    |
| <i>e_BL_var</i>         | BL   | 0.34  | 0.35    | 0.22     | -0.08 | 0.99 |
| <i>i_BL_var_[1]</i>     | BL   | 0.29  | -0.07   | 0.42     | -0.19 | 0.97 |
| <i>i_BL_median_[2]</i>  | BL   | 0.41  | 0.44    | 0.05     | 0.03  | 0.93 |
| <i>slope_ratio</i>      | LTT  | -0.06 | 0.07    | -0.55    | 0.23  | 0.91 |
| <i>i_BL_mean_[1]</i>    | BL   | -0.06 | -0.46   | 0.24     | -0.15 | 0.91 |
| <i>i_BL_mean_[2]</i>    | BL   | 0.41  | 0.43    | 0.03     | 0.03  | 0.9  |
| <i>slope_2</i>          | LTT  | 0.03  | -0.07   | 0.54     | -0.23 | 0.87 |
| <i>i_BL_median_[1]</i>  | BL   | -0.25 | -0.52   | -0.02    | -0.04 | 0.83 |
| <i>min_H</i>            | BL   | 0.56  | 0.21    | 0.03     | 0     | 0.8  |
| <i>max_H</i>            | BL   | 0.56  | 0.21    | 0.03     | 0     | 0.8  |
| <i>mean_b_time[2]</i>   | LTT  | 0.29  | 0.32    | -0.1     | 0.08  | 0.79 |
| <i>mean_s_time</i>      | LTT  | 0.24  | 0.23    | -0.11    | 0.04  | 0.62 |
| <i>ie_BL_var_[3]</i>    | BL   | 0.1   | -0.02   | 0.37     | -0.12 | 0.61 |
| <i>ie_BL_var_[1]</i>    | BL   | -0.06 | -0.29   | 0.11     | -0.05 | 0.51 |
| <i>ie_BL_var_[2]</i>    | BL   | 0.13  | -0.03   | 0.21     | -0.04 | 0.41 |
| <i>sackin</i>           | TOPO | -0.11 | 0.1     | -0.05    | -0.01 | 0.27 |
| <i>colless</i>          | TOPO | -0.08 | 0.07    | -0.03    | -0.01 | 0.19 |
| <i>WD_ratio</i>         | TOPO | 0.07  | -0.07   | 0.04     | 0.01  | 0.19 |
| $\Delta w$              | TOPO | 0.04  | -0.04   | 0.02     | 0     | 0.1  |
| <i>staircaseness_1</i>  | TOPO | 0.02  | -0.02   | 0.01     | 0.02  | 0.07 |
| <i>staircaseness_2</i>  | TOPO | 0     | 0       | 0.01     | -0.02 | 0.03 |
| <i>max_ladder</i>       | TOPO | 0.01  | 0       | 0.01     | 0     | 0.02 |
| <i>IL_nodes</i>         | TOPO | 0     | 0       | 0        | -0.01 | 0.01 |
