# Supplementary material for: Inferring epidemiological parameters from phylogenies using regression-ABC: A comparative study
Source: PubMed Central journal article supplement (PMC5358897; doi:10.1371/journal.pcbi.1005416), 2017-03-06
Supplement: pcbi.1005416.s025.pdf [file pcbi.1005416.s025.pdf]

## S10 Table

Table of correlations between the summary statistics of the BL, TOPO and LTT sets and the epidemiological parameters of the SI-DR model, for non-ultrametric trees of 300 leaves.

| Summary statistics      | Set  | $c_1$ | $\beta$ | $\gamma$ | $N$   | Sum  |
|-------------------------|------|-------|---------|----------|-------|------|
| <i>ie_BL_mean_[2]</i>   | BL   | 0.39  | 0.32    | 0.47     | -0.16 | 1.3  |
| <i>ie_BL_median_[2]</i> | BL   | 0.36  | 0.32    | 0.48     | -0.15 | 1.3  |
| <i>i_BL_var_[2]</i>     | BL   | 0.44  | 0.35    | 0.32     | -0.12 | 1.2  |
| <i>i_BL_var_[3]</i>     | BL   | 0.29  | 0.17    | 0.49     | -0.21 | 1.2  |
| <i>ie_BL_var_[2]</i>    | BL   | 0.35  | 0.18    | 0.43     | -0.17 | 1.1  |
| <i>e_BL_mean</i>        | BL   | 0.26  | 0.34    | -0.32    | 0.15  | 1.1  |
| <i>e_BL_median</i>      | BL   | 0.25  | 0.34    | -0.33    | 0.15  | 1.1  |
| <i>ie_BL_mean_[1]</i>   | BL   | -0.17 | -0.39   | 0.32     | -0.17 | 1    |
| <i>a_BL_mean</i>        | BL   | 0.32  | 0.37    | -0.23    | 0.11  | 1    |
| <i>a_BL_var</i>         | BL   | 0.31  | 0.38    | -0.22    | 0.12  | 1    |
| <i>i_BL_var_[1]</i>     | BL   | 0.36  | -0.04   | 0.42     | -0.21 | 1    |
| <i>slope_1</i>          | LTT  | -0.06 | 0.29    | -0.45    | 0.21  | 1    |
| <i>ie_BL_var_[3]</i>    | BL   | 0.18  | 0.04    | 0.56     | -0.23 | 1    |
| <i>i_BL_mean_[1]</i>    | BL   | 0.09  | -0.41   | 0.31     | -0.19 | 1    |
| <i>ie_BL_median_[1]</i> | BL   | -0.28 | -0.46   | 0.15     | -0.1  | 0.99 |
| <i>a_BL_median</i>      | BL   | 0.34  | 0.36    | -0.19    | 0.09  | 0.98 |
| <i>slope_2</i>          | LTT  | 0     | 0.17    | -0.57    | 0.23  | 0.97 |
| <i>mean_b_time[1]</i>   | LTT  | -0.1  | -0.37   | 0.33     | -0.17 | 0.97 |
| <i>mean_b_time[2]</i>   | LTT  | 0.24  | 0.34    | -0.26    | 0.13  | 0.97 |
| <i>e_BL_var</i>         | BL   | 0.39  | 0.36    | 0.15     | -0.06 | 0.96 |
| <i>i_BL_mean_[2]</i>    | BL   | 0.37  | 0.41    | -0.06    | 0.05  | 0.89 |
| <i>i_BL_median_[2]</i>  | BL   | 0.36  | 0.41    | -0.05    | 0.05  | 0.87 |
| <i>min_H</i>            | BL   | 0.55  | 0.21    | 0.04     | -0.03 | 0.83 |
| <i>max_H</i>            | BL   | 0.55  | 0.21    | 0.04     | -0.03 | 0.83 |
| <i>t_max_L</i>          | LTT  | 0.32  | -0.21   | 0.16     | -0.12 | 0.81 |
| <i>i_BL_median_[1]</i>  | BL   | -0.18 | -0.52   | -0.03    | -0.06 | 0.79 |
| <i>ie_BL_var_[1]</i>    | BL   | 0.03  | -0.25   | 0.33     | -0.17 | 0.78 |
| <i>i_BL_mean_[3]</i>    | BL   | 0.22  | 0.29    | -0.17    | 0.08  | 0.76 |
| <i>slope_ratio</i>      | LTT  | -0.11 | 0.29    | -0.21    | 0.12  | 0.73 |
| <i>i_BL_median_[3]</i>  | BL   | 0.19  | 0.28    | -0.18    | 0.08  | 0.73 |
| <i>IL_nodes</i>         | TOPO | -0.11 | -0.16   | 0.16     | -0.06 | 0.49 |
| <i>staircaseness_1</i>  | TOPO | 0.14  | 0.14    | -0.15    | 0.05  | 0.48 |
| <i>staircaseness_2</i>  | TOPO | -0.11 | -0.15   | 0.14     | -0.06 | 0.46 |
| <i>mean_b_time[3]</i>   | LTT  | 0.03  | 0.13    | -0.15    | 0.03  | 0.34 |
| <i>max_ladder</i>       | TOPO | -0.06 | -0.09   | 0.11     | -0.05 | 0.31 |
| <i>ie_BL_median_[3]</i> | BL   | -0.15 | 0.01    | 0.07     | -0.02 | 0.25 |
| <i>sackin</i>           | TOPO | -0.22 | -0.01   | -0.01    | 0     | 0.24 |
| <i>WD_ratio</i>         | TOPO | 0.18  | 0.03    | -0.02    | 0     | 0.23 |
| $\Delta w$              | TOPO | 0.13  | 0.05    | -0.02    | 0.02  | 0.22 |
| <i>ie_BL_mean_[3]</i>   | BL   | -0.05 | 0.08    | 0.07     | -0.01 | 0.21 |
| <i>colless</i>          | TOPO | -0.1  | 0.04    | -0.04    | 0.01  | 0.19 |
| <i>mean_s_time</i>      | LTT  | 0.01  | 0.01    | -0.02    | 0     | 0.04 |
