# Supplementary material for: Inferring epidemiological parameters from phylogenies using regression-ABC: A comparative study
Source: PubMed Central journal article supplement (PMC5358897; doi:10.1371/journal.pcbi.1005416), 2017-03-06
Supplement: pcbi.1005416.s026.pdf [file pcbi.1005416.s026.pdf]

## S11 Table

Table of correlations between the summary statistics of the COORDS set and the epidemiological parameters of the SI-DR model, for ultrametric trees of 300 leaves.

| Coordinate | $c_1$ | $\beta$ | $\gamma$ | $N$   | Sum  |
|------------|-------|---------|----------|-------|------|
| $x_{14}$   | 0.42  | 0.17    | 0.62     | -0.24 | 1.4  |
| $x_{13}$   | 0.28  | 0       | 0.76     | -0.3  | 1.3  |
| $x_{12}$   | 0.18  | -0.1    | 0.73     | -0.29 | 1.3  |
| $x_{11}$   | 0.1   | -0.18   | 0.67     | -0.27 | 1.2  |
| $x_{10}$   | 0.03  | -0.24   | 0.59     | -0.24 | 1.1  |
| $x_9$      | -0.03 | -0.29   | 0.51     | -0.21 | 1    |
| $x_{15}$   | 0.5   | 0.32    | 0.17     | -0.05 | 1    |
| $x_8$      | -0.09 | -0.33   | 0.42     | -0.18 | 1    |
| $x_7$      | -0.15 | -0.36   | 0.33     | -0.15 | 0.99 |
| $x_1$      | -0.41 | -0.44   | -0.1     | 0     | 0.95 |
| $x_6$      | -0.19 | -0.39   | 0.25     | -0.12 | 0.95 |
| $y_1$      | 0.25  | 0.37    | -0.22    | 0.11  | 0.95 |
| $y_2$      | 0.25  | 0.37    | -0.22    | 0.11  | 0.95 |
| $y_3$      | 0.25  | 0.37    | -0.22    | 0.11  | 0.95 |
| $y_4$      | 0.25  | 0.37    | -0.22    | 0.11  | 0.95 |
| $y_5$      | 0.25  | 0.37    | -0.22    | 0.11  | 0.95 |
| $y_6$      | 0.25  | 0.37    | -0.22    | 0.11  | 0.95 |
| $y_7$      | 0.25  | 0.37    | -0.22    | 0.11  | 0.95 |
| $y_8$      | 0.25  | 0.37    | -0.22    | 0.11  | 0.95 |
| $y_9$      | 0.25  | 0.37    | -0.22    | 0.11  | 0.95 |
| $y_{10}$   | 0.25  | 0.37    | -0.22    | 0.11  | 0.95 |
| $y_{11}$   | 0.25  | 0.37    | -0.22    | 0.11  | 0.95 |
| $y_{12}$   | 0.25  | 0.37    | -0.22    | 0.11  | 0.95 |
| $y_{13}$   | 0.25  | 0.37    | -0.22    | 0.11  | 0.95 |
| $y_{14}$   | 0.25  | 0.37    | -0.22    | 0.11  | 0.95 |
| $x_5$      | -0.24 | -0.41   | 0.17     | -0.1  | 0.92 |
| $x_2$      | -0.37 | -0.46   | -0.05    | -0.03 | 0.91 |
| $x_{16}$   | 0.54  | 0.29    | 0.06     | 0     | 0.89 |
| $x_4$      | -0.29 | -0.43   | 0.09     | -0.07 | 0.88 |
| $x_{17}$   | 0.55  | 0.26    | 0.06     | 0     | 0.87 |
| $y_{19}$   | -0.21 | -0.32   | 0.21     | -0.11 | 0.85 |
| $x_3$      | -0.33 | -0.45   | 0.01     | -0.05 | 0.84 |
| $y_{20}$   | -0.18 | -0.29   | 0.25     | -0.12 | 0.84 |
| $x_{18}$   | 0.56  | 0.22    | 0.04     | 0     | 0.82 |
| $y_{16}$   | 0.27  | 0.28    | 0.21     | -0.06 | 0.82 |
| $x_{19}$   | 0.56  | 0.21    | 0.03     | 0     | 0.8  |
| $x_{20}$   | 0.56  | 0.21    | 0.03     | 0     | 0.8  |
| $y_{15}$   | 0.24  | 0.36    | -0.13    | 0.07  | 0.8  |
| $y_{17}$   | 0.14  | 0.22    | 0.01     | 0.01  | 0.38 |
| $y_{18}$   | -0.04 | -0.03   | 0.06     | -0.01 | 0.14 |
