# Supplementary material for: Inferring epidemiological parameters from phylogenies using regression-ABC: A comparative study
Source: PubMed Central journal article supplement (PMC5358897; doi:10.1371/journal.pcbi.1005416), 2017-03-06
Supplement: pcbi.1005416.s027.pdf [file pcbi.1005416.s027.pdf]

## S12 Table

Table of correlations between the summary statistics of the COORDS set and the epidemiological parameters of the SI-DR model, for non-ultrametric trees of 300 leaves.

| Coordinate | $c_1$ | $\beta$ | $\gamma$ | $N$   | Sum  |
|------------|-------|---------|----------|-------|------|
| $x_{10}$   | 0.26  | -0.19   | 0.56     | -0.27 | 1.3  |
| $x_{11}$   | 0.48  | -0.07   | 0.44     | -0.22 | 1.2  |
| $x_{14}$   | 0.55  | 0.05    | 0.37     | -0.18 | 1.2  |
| $x_{13}$   | 0.53  | 0.01    | 0.39     | -0.19 | 1.1  |
| $x_{15}$   | 0.57  | 0.11    | 0.3      | -0.14 | 1.1  |
| $x_9$      | 0.09  | -0.28   | 0.5      | -0.24 | 1.1  |
| $x_{12}$   | 0.51  | -0.02   | 0.39     | -0.19 | 1.1  |
| $y_{12}$   | 0.09  | 0.23    | -0.53    | 0.23  | 1.1  |
| $y_{13}$   | 0.07  | 0.22    | -0.55    | 0.24  | 1.1  |
| $y_{10}$   | 0.12  | 0.26    | -0.48    | 0.21  | 1.1  |
| $y_{11}$   | 0.11  | 0.24    | -0.5     | 0.22  | 1.1  |
| $x_{16}$   | 0.57  | 0.16    | 0.22     | -0.11 | 1.1  |
| $y_{14}$   | 0.05  | 0.2     | -0.57    | 0.24  | 1.1  |
| $y_{15}$   | 0.04  | 0.18    | -0.58    | 0.24  | 1    |
| $x_1$      | -0.41 | -0.46   | -0.12    | 0.01  | 1    |
| $x_{17}$   | 0.57  | 0.18    | 0.17     | -0.08 | 1    |
| $y_{16}$   | 0.02  | 0.16    | -0.58    | 0.24  | 1    |
| $x_8$      | -0.02 | -0.34   | 0.4      | -0.2  | 0.96 |
| $x_{18}$   | 0.57  | 0.19    | 0.13     | -0.07 | 0.96 |
| $y_{17}$   | 0.01  | 0.15    | -0.57    | 0.23  | 0.96 |
| $y_9$      | 0.14  | 0.27    | -0.38    | 0.16  | 0.95 |
| $x_2$      | -0.37 | -0.48   | -0.09    | -0.01 | 0.95 |
| $x_7$      | -0.1  | -0.39   | 0.3      | -0.16 | 0.95 |
| $x_6$      | -0.17 | -0.42   | 0.2      | -0.12 | 0.91 |
| $x_{19}$   | 0.56  | 0.21    | 0.07     | -0.05 | 0.89 |
| $y_{18}$   | 0.01  | 0.13    | -0.54    | 0.21  | 0.89 |
| $x_3$      | -0.33 | -0.47   | -0.04    | -0.03 | 0.87 |
| $x_5$      | -0.23 | -0.44   | 0.1      | -0.08 | 0.85 |
| $x_{20}$   | 0.55  | 0.21    | 0.04     | -0.03 | 0.83 |
| $x_4$      | -0.28 | -0.46   | 0.03     | -0.05 | 0.82 |
| $y_8$      | 0.16  | 0.27    | -0.27    | 0.11  | 0.81 |
| $y_{19}$   | 0     | 0.12    | -0.47    | 0.18  | 0.77 |
| $y_7$      | 0.19  | 0.27    | -0.18    | 0.08  | 0.72 |
| $y_6$      | 0.22  | 0.26    | -0.11    | 0.04  | 0.63 |
| $y_5$      | 0.24  | 0.25    | -0.06    | 0.02  | 0.57 |
| $y_{20}$   | 0     | 0.08    | -0.32    | 0.13  | 0.53 |
| $y_4$      | 0.24  | 0.24    | -0.02    | 0.01  | 0.51 |
| $y_3$      | 0.24  | 0.23    | 0        | -0.01 | 0.48 |
| $y_2$      | 0.23  | 0.16    | -0.03    | -0.02 | 0.44 |
| $y_1$      | 0.13  | -0.02   | -0.12    | 0     | 0.27 |
