# Supplementary material for: Inferring epidemiological parameters from phylogenies using regression-ABC: A comparative study
Source: PubMed Central journal article supplement (PMC5358897; doi:10.1371/journal.pcbi.1005416), 2017-03-06
Supplement: pcbi.1005416.s028.pdf [file pcbi.1005416.s028.pdf]

### S13 Table

Table of correlations between the summary statistics of the BL, LTT and TOPO sets and the epidemiological parameters of the BDEI model, for trees of 72 leaves simulated assuming  $p \approx 0.4$ .

| Summary statistics      | Set  | $R_0$ | $d_E$ | $d_I$ | Sum  |
|-------------------------|------|-------|-------|-------|------|
| <i>max_H</i>            | BL   | -0.64 | 0.22  | 0.49  | 1.4  |
| <i>e_BL_var</i>         | BL   | -0.44 | 0.43  | 0.47  | 1.3  |
| <i>i_BL_mean_[2]</i>    | BL   | -0.55 | 0.37  | 0.41  | 1.3  |
| <i>i_BL_var_[2]</i>     | BL   | -0.56 | 0.41  | 0.36  | 1.3  |
| <i>t_max_L</i>          | LTT  | -0.62 | 0.18  | 0.47  | 1.3  |
| <i>slope_1</i>          | LTT  | 0.7   | -0.13 | -0.44 | 1.3  |
| <i>mean_b_time[2]</i>   | LTT  | -0.69 | 0.17  | 0.4   | 1.3  |
| <i>i_BL_var_[3]</i>     | BL   | -0.52 | 0.37  | 0.37  | 1.3  |
| <i>i_BL_mean_[1]</i>    | BL   | -0.6  | 0.18  | 0.43  | 1.2  |
| <i>i_BL_var_[1]</i>     | BL   | -0.53 | 0.29  | 0.39  | 1.2  |
| <i>i_BL_median_[2]</i>  | BL   | -0.48 | 0.3   | 0.42  | 1.2  |
| <i>slope_2</i>          | LTT  | 0.54  | -0.2  | -0.41 | 1.2  |
| <i>a_BL_var</i>         | BL   | -0.29 | 0.43  | 0.38  | 1.1  |
| <i>mean_s_time</i>      | LTT  | -0.49 | 0.17  | 0.44  | 1.1  |
| <i>mean_b_time[1]</i>   | LTT  | -0.59 | -0.05 | 0.43  | 1.1  |
| <i>i_BL_mean_[3]</i>    | BL   | -0.25 | 0.48  | 0.34  | 1.1  |
| <i>i_BL_median_[1]</i>  | BL   | -0.58 | 0.04  | 0.42  | 1    |
| <i>a_BL_mean</i>        | BL   | -0.22 | 0.41  | 0.39  | 1    |
| <i>ie_BL_median_[1]</i> | BL   | -0.62 | -0.17 | 0.23  | 1    |
| <i>i_BL_median_[3]</i>  | BL   | -0.13 | 0.52  | 0.29  | 0.94 |
| <i>a_BL_median</i>      | BL   | -0.14 | 0.42  | 0.37  | 0.93 |
| <i>ie_BL_mean_[1]</i>   | BL   | -0.62 | -0.1  | 0.21  | 0.93 |
| <i>ie_BL_median_[2]</i> | BL   | -0.65 | -0.08 | 0.18  | 0.91 |
| <i>mean_b_time[3]</i>   | LTT  | -0.21 | 0.36  | 0.33  | 0.9  |
| <i>max_L</i>            | LTT  | 0.56  | -0.02 | -0.24 | 0.82 |
| <i>e_BL_median</i>      | BL   | 0.12  | 0.38  | 0.29  | 0.79 |
| <i>ie_BL_mean_[2]</i>   | BL   | -0.66 | -0.01 | 0.12  | 0.79 |
| <i>e_BL_mean</i>        | BL   | -0.02 | 0.4   | 0.33  | 0.75 |
| <i>min_H</i>            | BL   | -0.34 | 0.12  | 0.22  | 0.68 |
| <i>ie_BL_var_[2]</i>    | BL   | -0.35 | 0.13  | -0.08 | 0.56 |
| <i>ie_BL_mean_[3]</i>   | BL   | -0.41 | 0.15  | 0     | 0.56 |
| <i>ie_BL_median_[3]</i> | BL   | -0.37 | 0.18  | 0.01  | 0.56 |
| <i>staircaseness_1</i>  | Topo | 0.13  | -0.29 | 0.08  | 0.5  |
| <i>ie_BL_var_[1]</i>    | BL   | -0.34 | -0.02 | 0.11  | 0.47 |
| <i>staircaseness_2</i>  | Topo | -0.15 | 0.24  | -0.07 | 0.46 |
| <i>IL_nodes</i>         | Topo | -0.2  | 0.21  | -0.03 | 0.44 |
| <i>ie_BL_var_[3]</i>    | BL   | -0.29 | 0.04  | -0.08 | 0.41 |
| <i>WD_ratio</i>         | Topo | 0.08  | -0.22 | 0.08  | 0.38 |
| <i>max_ladder</i>       | Topo | -0.09 | 0.2   | -0.08 | 0.37 |
| <i>slope_ratio</i>      | LTT  | -0.04 | 0.2   | 0.1   | 0.34 |
| <i>sackin</i>           | Topo | -0.15 | 0.14  | -0.01 | 0.3  |
| $\Delta w$              | Topo | 0.04  | -0.17 | 0.08  | 0.29 |
| <i>colless</i>          | Topo | 0.07  | 0.09  | -0.05 | 0.21 |
