# Supplementary material for: Inferring epidemiological parameters from phylogenies using regression-ABC: A comparative study
Source: PubMed Central journal article supplement (PMC5358897; doi:10.1371/journal.pcbi.1005416), 2017-03-06
Supplement: pcbi.1005416.s029.pdf [file pcbi.1005416.s029.pdf]

## S14 Table

Table of correlations between the summary statistics of the COORDS set and the epidemiological parameters of the BDEI model, for trees of 72 leaves simulated assuming  $p \approx 0.4$ .

| Coordinate | $R_0$ | $d_E$ | $d_I$ | Sum  |
|------------|-------|-------|-------|------|
| $x_{20}$   | -0.63 | 0.25  | 0.48  | 1.4  |
| $x_{18}$   | -0.62 | 0.25  | 0.48  | 1.4  |
| $x_{19}$   | -0.62 | 0.25  | 0.48  | 1.4  |
| $x_{16}$   | -0.61 | 0.25  | 0.48  | 1.3  |
| $x_{17}$   | -0.61 | 0.25  | 0.48  | 1.3  |
| $x_8$      | -0.68 | 0.19  | 0.46  | 1.3  |
| $x_9$      | -0.67 | 0.2   | 0.46  | 1.3  |
| $x_{10}$   | -0.65 | 0.21  | 0.46  | 1.3  |
| $x_{15}$   | -0.6  | 0.25  | 0.47  | 1.3  |
| $x_7$      | -0.68 | 0.17  | 0.46  | 1.3  |
| $x_6$      | -0.68 | 0.16  | 0.46  | 1.3  |
| $x_{14}$   | -0.6  | 0.24  | 0.46  | 1.3  |
| $x_5$      | -0.68 | 0.15  | 0.46  | 1.3  |
| $x_{13}$   | -0.59 | 0.24  | 0.46  | 1.3  |
| $x_4$      | -0.68 | 0.14  | 0.46  | 1.3  |
| $x_{12}$   | -0.59 | 0.23  | 0.45  | 1.3  |
| $x_{11}$   | -0.59 | 0.23  | 0.44  | 1.3  |
| $x_3$      | -0.67 | 0.12  | 0.46  | 1.2  |
| $x_2$      | -0.66 | 0.08  | 0.46  | 1.2  |
| $x_1$      | -0.6  | 0.01  | 0.46  | 1.1  |
| $y_{11}$   | 0.57  | -0.02 | -0.23 | 0.82 |
| $y_{12}$   | 0.59  | -0.01 | -0.21 | 0.81 |
| $y_{13}$   | 0.6   | -0.01 | -0.2  | 0.81 |
| $y_{10}$   | 0.55  | -0.01 | -0.24 | 0.8  |
| $y_{14}$   | 0.61  | -0.01 | -0.18 | 0.8  |
| $y_9$      | 0.53  | -0.01 | -0.25 | 0.79 |
| $y_{15}$   | 0.61  | -0.01 | -0.17 | 0.79 |
| $y_8$      | 0.51  | -0.01 | -0.26 | 0.78 |
| $y_7$      | 0.48  | 0     | -0.27 | 0.75 |
| $y_{16}$   | 0.6   | 0     | -0.15 | 0.75 |
| $y_6$      | 0.46  | 0     | -0.27 | 0.73 |
| $y_5$      | 0.43  | 0     | -0.28 | 0.71 |
| $y_4$      | 0.4   | 0.01  | -0.28 | 0.69 |
| $y_{17}$   | 0.57  | 0     | -0.12 | 0.69 |
| $y_3$      | 0.37  | 0.02  | -0.27 | 0.66 |
| $y_2$      | 0.32  | 0.04  | -0.26 | 0.62 |
| $y_{18}$   | 0.5   | 0.01  | -0.09 | 0.6  |
| $y_1$      | 0.24  | 0.07  | -0.19 | 0.5  |
| $y_{19}$   | 0.37  | 0.03  | -0.06 | 0.46 |
| $y_{20}$   | 0.14  | 0.01  | -0.02 | 0.17 |
